# Supplementary material for: Assessing Genetic Overlap Between Platelet Parameters and Neurodegenerative Disorders
Source: PubMed Central journal article supplement (PMC7575686; doi:10.3389/fimmu.2020.02127), 2020-10-07
Supplement: DataSheet_1.pdf [file DataSheet_1.pdf]

### Supplementary Methods

| Study | Phenotype | #variants<br>before/after QC <sup>a</sup> | Ntot<br>(Ncases/Nctrl) <sup>b</sup> | URL <sup>c</sup>                                                                                                                                                                    |
|-------|-----------|-------------------------------------------|-------------------------------------|-------------------------------------------------------------------------------------------------------------------------------------------------------------------------------------|
| (1)   | PD        | 10,674,335/922,182                        | 1,528,473<br>(56,306/1,474,097)     | <a href="https://drive.google.com/file/d/1FZ9UL99LAqyWnyNBxxlx6qOUIfAnubIN/view?usp=sharing">https://drive.google.com/file/d/1FZ9UL99LAqyWnyNBxxlx6qOUIfAnubIN/view?usp=sharing</a> |
| (2)   | AD        | 13,367,299/1,146,109                      | 455,258<br>(71,880/383,378)         | <a href="https://ctg.cncr.nl/software/summary_statistics">https://ctg.cncr.nl/software/summary_statistics</a>                                                                       |
| (3)   | Plt       | 29,522,061/1,180,459                      | 166,066<br>(NA)                     | <a href="ftp://ftp.sanger.ac.uk/pub/project/humgen/summary_statistics/human/2017-12-12/">ftp://ftp.sanger.ac.uk/pub/project/humgen/summary_statistics/human/2017-12-12/</a>         |
|       | MPV       | 29,519,497/1,180,437                      | 164,454<br>(NA)                     | <a href="ftp://ftp.sanger.ac.uk/pub/project/humgen/summary_statistics/human/2017-12-12/">ftp://ftp.sanger.ac.uk/pub/project/humgen/summary_statistics/human/2017-12-12/</a>         |
|       | PDW       | 29,518,092/1,180,156                      | 164,433<br>(NA)                     |                                                                                                                                                                                     |

**Table S1.** GWAS studies which were used for the Linkage Disequilibrium (LD) score regression analysis.

<sup>a</sup> Number of genetic variants before and after quality control (QC) are reported for each study.

<sup>b</sup> Number of cases and controls are reported where applicable (AD and PD case-control GWAS studies).

<sup>c</sup> URLs where association statistics are available for download.

Abbreviations: AD = Alzheimer Disease; PD = Parkinson Disease; Plt = platelet count; MPV = mean platelet volume; PDW = platelet distribution width.

## References

1. Nalls MA, Blauwendraat C, Vallerga CL, Heilbron K, Bandres-Ciga S, Chang D, Tan M, Kia DA, Noyce AJ, Xue A, et al. Expanding Parkinson's disease genetics: novel risk loci, genomic context, causal insights and heritable risk. *bioRxiv* (2019)388165. doi:10.1101/388165
2. Jansen IE, Savage JE, Watanabe K, Bryois J, Williams DM, Steinberg S, Sealock J, Karlsson IK, Hägg S, Athanasiu L, et al. Genome-wide meta-analysis identifies new loci and functional pathways influencing Alzheimer's disease risk. *Nat Genet* (2019) **51**:404–413. doi:10.1038/s41588-018-0311-9
3. Astle WJ, Elding H, Jiang T, Allen D, Ruklisa D, Mann AL, Mead D, Bouman H, Riveros-Mckay F, Kostadima MA, et al. The Allelic Landscape of Human Blood Cell Trait Variation and Links to Common Complex Disease. *Cell* (2016) **167**:1415-1429.e19. doi:10.1016/j.cell.2016.10.042
